# Supplementary material
Source: MDPI journal article supplement (https://www.mdpi.com/2673-4583/3/1/124)
Supplement: s1 [file s1]

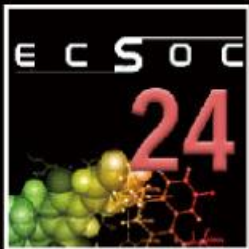

# The 24th International Electronic Conference on Synthetic Organic Chemistry

15 Nov–15 Dec 2020

chaired by Dr. Julio A. Seijas Vázquez

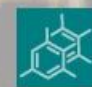

*molecules*

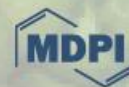

## Chemical fingerprinting and antimicrobial evaluation of the methanolic extract of the leaves of the endemic Cuban plant *Coccoloba cowellii*

**Authors:** Daniel Méndez Rodríguez, MSc.  
Prof. Julio C Escalona Arranz, PhD.  
Prof. Luc Pieters, PhD.  
Prof. Paul Cos, PhD.

## Introduction

The genus *Coccoloba* comprises approximately 120-150 species of flowering plants from the subfamily Erigonoideae of the Polygonaceae, order Caryophyllales. In Cuba, the presence of 34 species of *Coccoloba* has been informed [1]. From them, 25 are recognized as endemic. Nevertheless, just informs of *C. uvifera* ethnopharmacological uses was found in the consulted bibliography related to the treatment of sores and grains, hoarseness, asthma, dysentery, anti-hemorrhagic and body itching [2].

One of the almost unknown endemic plant of this genus that grow up in Cuba is *Coccoloba cowellii* Britton, which classifies as critically endangered (CR) according to the International Union for Conservation of Nature (IUCN) [3]. Only preliminary information is known about the chemical composition of this plant and its antioxidant activity [4]. This gap in the knowledge of this species which risk of disappearing without having been explored in their potential, led us to the development of this research. With this intention, ultrahigh-performance liquid chromatography – high resolution mass spectrometry (UHPLC-HRMS) was selected as analytical technique suitable for studying the non-volatile phytochemical composition of *C. cowellii* leaves, collecting as little plant material as possible. Microanalytical pharmacological tests were also considered with this conservation purpose.

1. Noa, I.C. *Coccoloba howardii* (Polygonaceae), a new species from Cuba. *Willdenowia* 2012, 42, 95–98, doi:10.3372/wi.42.42112.
2. Roig y Mesa, J.T. *Plantas medicinales, aromáticas o venenosas de Cuba (Tomo II)*; 2nd ed.; Editorial Científico-Técnica: La Habana, 2012; ISBN 978-959-05-0814-1.
3. González-Torres, L; Palmarola, A; González-Oliva, L; Bécquer, E; Testé, E. and Barrios, D. (Eds. . *Lista Roja*; 2016; Vol. 10; ISBN 978-959-300-113-7.
4. Méndez Rodríguez, D.; Molina Pérez, E.; Spengler Salabarría, I.; Escalona-Arranz, J.C.; Cos, P. Chemical composition and antioxidant activity of *Coccoloba cowellii* Britton *Lic. Rev. Cuba. Química* 2019, 32, 185–198.

## Introduction

### *Coccoloba cowellii* Britton

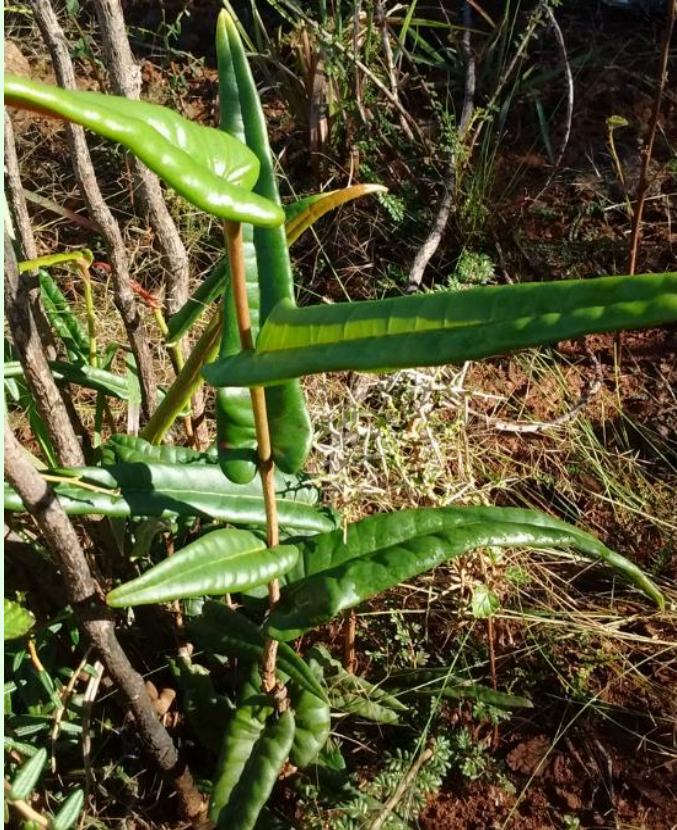

Kingdom: Plantae

Division: Magnoliophyta

Class: Magnoliopsida

Order: Caryophyllales

Family: Polygonaceae

Subfamily: Eriogonoideae

Genus: *Coccoloba*

Species: *Coccoloba cowellii* Britton

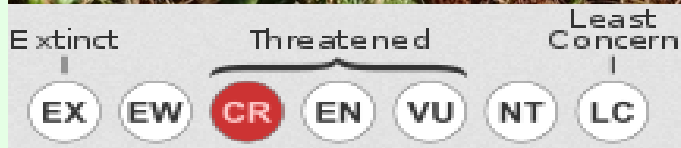



## Collection of plant material

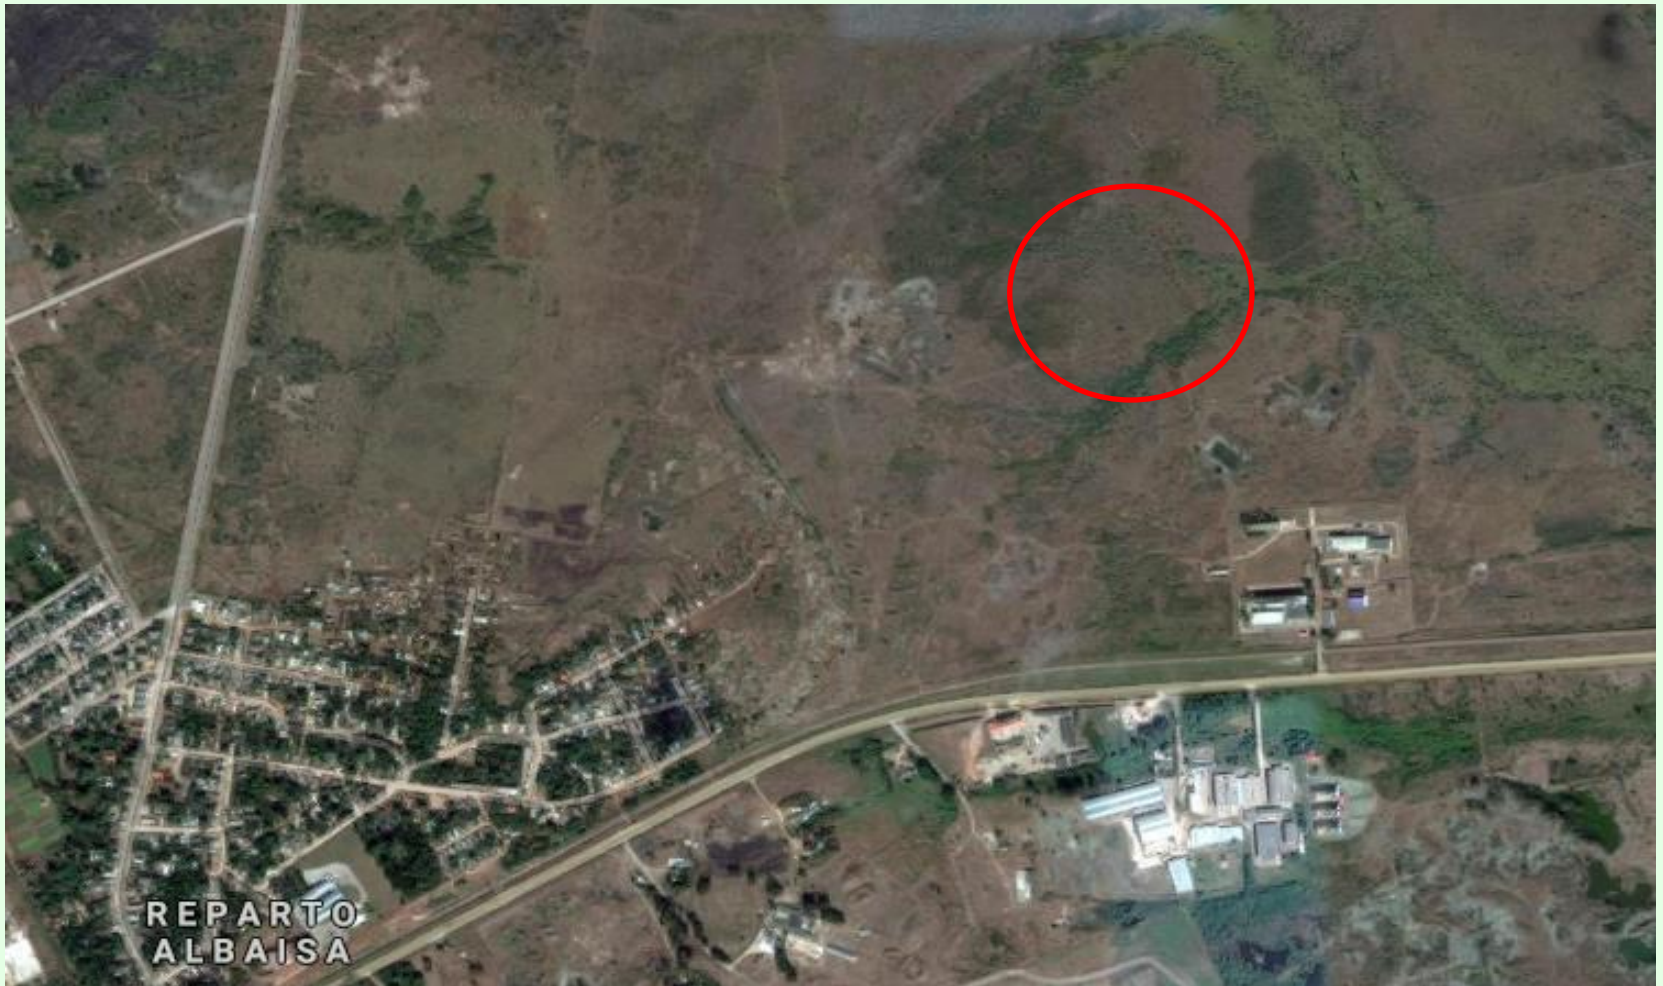

The plant material (*Coccoloba cowellii* leaves) was collected in July 2019, near the town of Albaisa, Camagüey province (Lat 21.43615, Lon -77.83253).

## Dereplication strategy for the leaves extract of *C. cowellii*

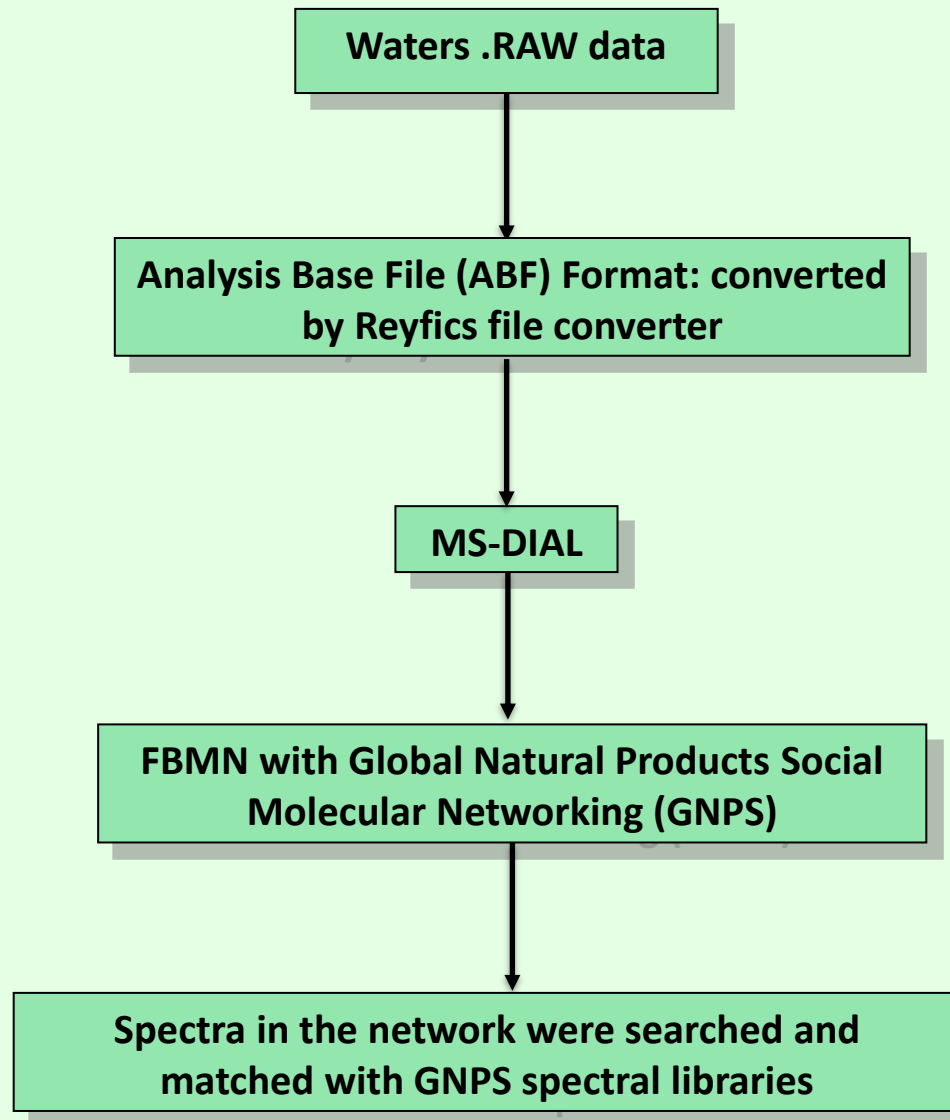

# Results

## HPLC-DAD/QTOF-MS of the total extract of *C. cowellii*

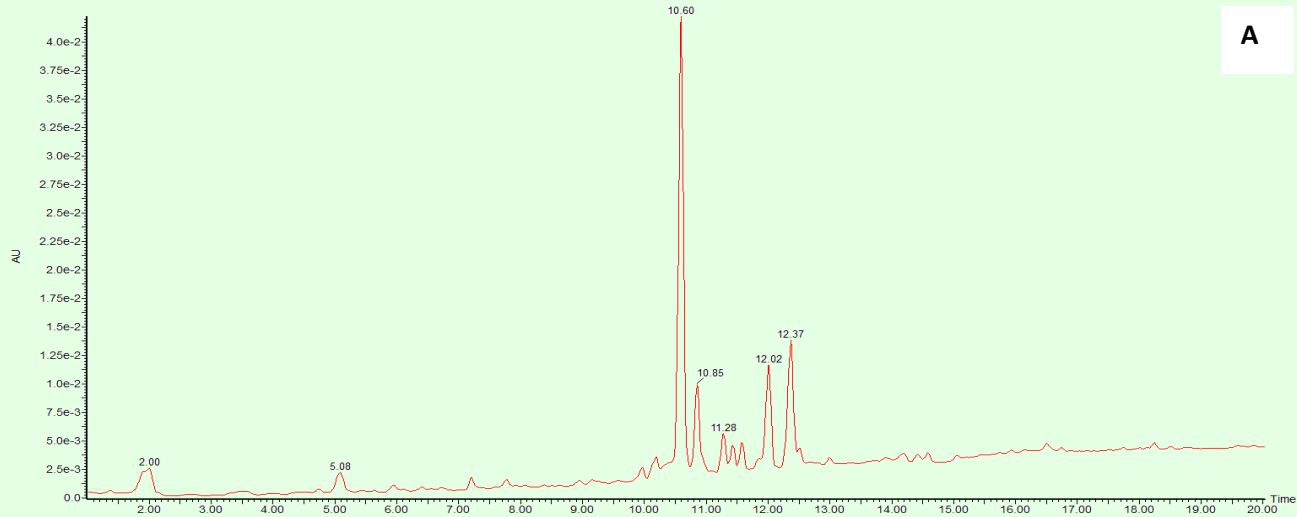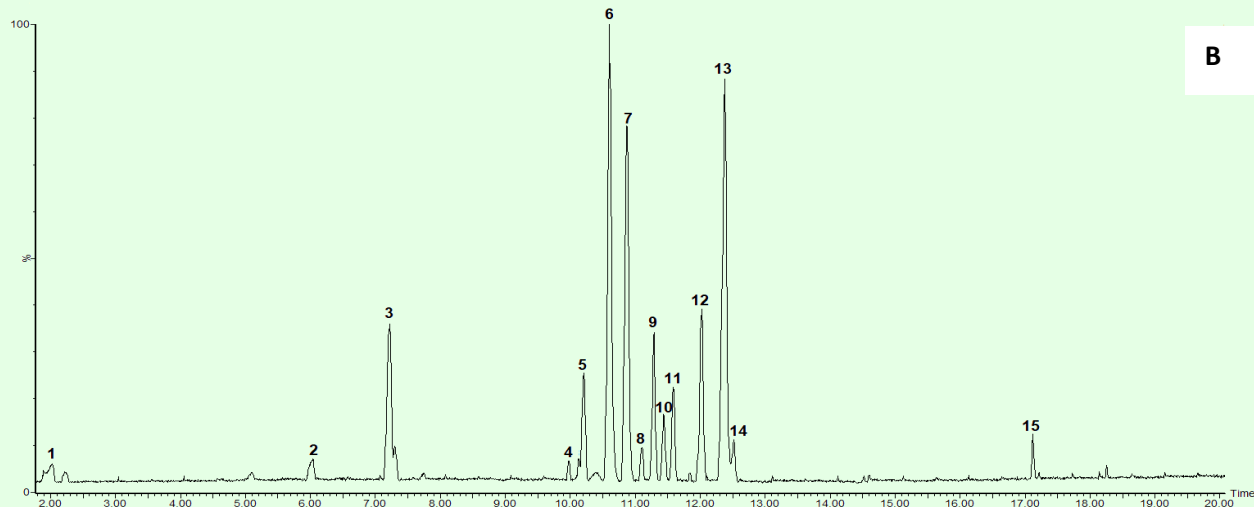

Base peak intensity (BPI) chromatograms of: (A) UV at 280 nm and (B) MS in negative ion mode for the methanolic extract of *C. cowellii* leaves.

## Results

# Dereplication strategy for the methanolic extract of *C. cowellii*

**Table 1.** Library hits found in the spectra of the methanolic extract of *C. cowellii* against the GNPS database.

| Compound name                                     | Library class | cosine | MZErrorPPM | LibMZ   |
|---------------------------------------------------|---------------|--------|------------|---------|
| Quercetin-3-O-rhamnoside (Quercitrin)             | Bronze        | 0.85   | 1          | 447.093 |
| Quercetin-3-O-galactoside (Hyperoside)            | Bronze        | 0.80   | 0          | 463.088 |
| Quercetin-3-O-arabinoside (Avicularin)            | Bronze        | 0.72   | 0          | 433.078 |
| Quercetin-3-O-glucuronide                         | Bronze        | 0.84   | 1          | 477.067 |
| Quercetin 3-(2-galloylglucoside)                  | Bronze        | 0.73   | 37         | 615.099 |
| Myricetin-3-O-pentoside                           | Bronze        | 0.85   | 10         | 449.067 |
| Myricetin-3-O-galactoside                         | Bronze        | 0.93   | 2          | 479.083 |
| 4'-O-Methylmyricetin-3-O-rhamnoside (Mearnsitrin) | Gold          | 0.83   | 93         | 477.104 |
| Procyanidin B1                                    | Bronze        | 0.81   | 1          | 577.136 |
| Procyanidin B2                                    | Bronze        | 0.71   | 14         | 575.108 |
| Catechin-3-O-gallate                              | Bronze        | 0.81   | 2          | 441.083 |
| Epicatechin-3-O-gallate                           | Bronze        | 0.71   | 10         | 487.088 |

MZErrorPPM: ppm error with the spectral library match, LibMZ: m/z value of the spectral library match.

# Results

## HPLC-DAD/QTOF-MS of the methanolic extract of *C. cowellii*

**Table 2.** Chemical composition of the methanolic extract from the leaves of *C. cowellii*.

| Peak No. | Rt (min) | [M-H] <sup>-</sup> (m/z) | MS/MS ions              | Acc Mass | ppm  | MF                                              | Tentative identification       |
|----------|----------|--------------------------|-------------------------|----------|------|-------------------------------------------------|--------------------------------|
| 1        | 2.03     | 169                      | 125                     | 169.0130 | -4.1 | C <sub>7</sub> H <sub>5</sub> O <sub>5</sub>    | Gallic acid (std)              |
| 2        | 6.04     | 289                      | 245/165/137             | 289.0693 | -6.6 | C <sub>15</sub> H <sub>13</sub> O <sub>6</sub>  | Catechin (std)                 |
| 3        | 7.22     | 289                      | 245/205/179/165/137/125 | 289.0693 | -6.6 | C <sub>15</sub> H <sub>13</sub> O <sub>6</sub>  | Epicatechin (std)              |
| 4        | 9.98     | 479                      | 317/316/287/271         | 479.0845 | 4.0  | C <sub>21</sub> H <sub>19</sub> O <sub>13</sub> | Myricetin-3-O-hexoside         |
| 5        | 10.21    | 729                      | 577/451/441/407/289/287 | 729.1466 | 1.4  | C <sub>37</sub> H <sub>29</sub> O <sub>16</sub> | B-type procyanidin monogallate |
| 6        | 10.60    | 493                      | 317/287/179             | 493.0612 | -1.2 | C <sub>21</sub> H <sub>17</sub> O <sub>14</sub> | Myricetin glucuronide          |
| 7        | 10.87    | 441                      | 289/169/125             | 441.0815 | -0.7 | C <sub>22</sub> H <sub>17</sub> O <sub>10</sub> | Epicatechin-3-O-gallate (std)  |
| 8        | 11.11    | 567                      | 341/326/161             | 567.2066 | -2.1 | C <sub>27</sub> H <sub>35</sub> O <sub>13</sub> | Unknown                        |
| 9        | 11.29    | 463                      | 317/316/287/271         | 463.0859 | -3.9 | C <sub>21</sub> H <sub>19</sub> O <sub>12</sub> | Myricetin deoxyhexoside        |
| 10       | 11.43    | 463                      | 301/300/271             | 463.0859 | -3.9 | C <sub>21</sub> H <sub>19</sub> O <sub>12</sub> | Quercetin hexoside 1           |
| 11       | 11.58    | 463                      | 301/300/271             | 463.0859 | -3.9 | C <sub>21</sub> H <sub>19</sub> O <sub>12</sub> | Quercetin hexoside 2           |
| 12       | 12.02    | 477                      | 301/271                 | 477.0659 | -2.1 | C <sub>21</sub> H <sub>17</sub> O <sub>13</sub> | Quercetin glucuronide          |
| 13       | 12.38    | 433                      | 301/300/271/255         | 433.0745 | -6.0 | C <sub>20</sub> H <sub>17</sub> O <sub>11</sub> | Quercetin pentoside 1          |
| 14       | 12.51    | 433                      | 301/300/271             | 433.0745 | -6.0 | C <sub>20</sub> H <sub>17</sub> O <sub>11</sub> | Quercetin pentoside 2          |
| 15       | 17.12    | 331                      | 313/161                 | 331.2498 | 4.2  | C <sub>18</sub> H <sub>35</sub> O <sub>5</sub>  | Unknown                        |

Rt, retention time; Acc Mass, accurate mass; ppm, error associated with the accurate mass; MF, molecular formula. <sup>(std)</sup> The compound was also identified by comparing the chromatography behaviour with the authentic standards.



## Results

### Antimicrobial screening of the methanolic extract of *C. cowellii*

| Test sample | Cytotoxicity (IC <sub>50</sub> µg/mL) | Antimicrobial screening (IC <sub>50</sub> µg/mL) |                |                    |                     |                      |                 |                  |
|-------------|---------------------------------------|--------------------------------------------------|----------------|--------------------|---------------------|----------------------|-----------------|------------------|
|             | MRC-5 SV2                             | <i>S. aureus</i>                                 | <i>E. coli</i> | <i>C. albicans</i> | <i>A. fumigatus</i> | <i>C. neoformans</i> | <i>T. cruzi</i> | <i>T. brucei</i> |
| ME          | >64.00                                | >64.00                                           | >64.00         | 1.68±0.64          | >64.00              | 2.69±2.02            | 38.38±6.82      | 33.12±0.38       |

ME: methanolic extract. MRC-5 SV2: Human fetal lung fibroblasts; *S. aureus*: *Staphylococcus aureus*; *E. coli*: *Escherichia coli*; *C. albicans*: *Candida albicans*; *A. fumigatus*: *Aspergillus fumigatus*; *C. neoformans*: *Cryptococcus neoformans*; *T. cruzi*: *Trypanosoma cruzi*; *T. brucei*: *Trypanosoma brucei*. Reference compounds: Tamoxifen (MRC-5 SV2) IC<sub>50</sub> 10.49 µM; Doxycycline (*S. aureus*) IC<sub>50</sub> 0.18 µM; Doxycycline (*E. coli*) IC<sub>50</sub> 0.60 µM; Flucytosine (*C. albicans*) IC<sub>50</sub> 0.61 µM; Econazole (*A. fumigatus*) IC<sub>50</sub> 0.74 µM; Miconazole (*C. neoformans*) IC<sub>50</sub> 0.15 µM; Benznidazole (*T. cruzi*) IC<sub>50</sub> 3.13 µM; Suramine (*T. brucei*) IC<sub>50</sub> 0.05 µM.

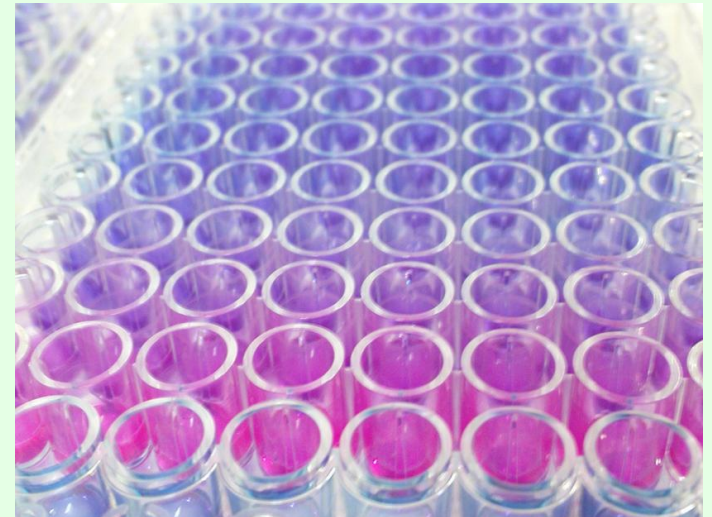

## Conclusions

Thirteen metabolites were detected from the methanolic extract of the leaves of the endemic Cuban plant *Coccoloba cowellii*, using UHPLC-ESI-QTOF-MS analysis, including gallic acid, catechin, epicatechin and epicatechin-3-O-gallate. *C. cowellii* showed a good antifungal activity against *Candida albicans* and *Cryptococcus neoformans* and a moderate activity against parasites. This report could contribute for the better understanding of chemistry and biological activities in the genus *Coccoloba*, increasing the interest in *C. cowelli* plants and encouraging the implementation of future conservation strategies. Other studies are being carried out to corroborate these results and determine the metabolites responsible for the aforementioned activities.

## Acknowledgments

This research was funded by VLIR-IUC, grant number CU2019IUC030A105-77143 and VLIR-TEAM, grant number CU2017TEA433A102
